# Supplementary material for: Convenient synthesis of perhydrobenz[e]indene triketone, a key intermediate for the total synthesis of stelletins
Source: Royal Society of Chemistry journal article supplement (doi:10.1039/d3ob00319a), 2023-01-01
Supplement: d3ob00319a1.pdf [file d3ob00319a1.pdf]

## Supporting Information

### Convenient synthesis of *trans-syn-trans* perhydrobenz[e]indene triketone, a key intermediate for the total synthesis of stelletins

Yang Cao,<sup>a</sup> Xiaoyu Liu,<sup>a</sup> Zhe Wang,<sup>a</sup> Yuan Wang,<sup>a</sup> Xiaozhen Jiao,<sup>a\*</sup> and Ping Xie<sup>a\*</sup>

*<sup>a</sup>State Key Laboratory of Bioactive Substance and Function of Natural Medicines, Beijing Key Laboratory of Active Substances Discovery and Druggability Evaluation, Institute of Materia Medica, Chinese Academy of Medical Sciences and Peking Union Medical College, Beijing 100050, China.*

*Fax: +86 10 63017757; Tel: +86 10 63165242*

*Email: jiaoxz@imm.ac.cn, xp@imm.ac.cn*

### Contents

|                                                                       | Page  |
|-----------------------------------------------------------------------|-------|
| <sup>1</sup> H and <sup>13</sup> C NMR spectra of compound <b>4</b>   | SI-2  |
| <sup>1</sup> H and <sup>13</sup> C NMR spectra of compound <b>5</b>   | SI-3  |
| <sup>1</sup> H and <sup>13</sup> C NMR spectra of compound <b>6</b>   | SI-4  |
| <sup>1</sup> H and <sup>13</sup> C NMR spectra of compound <b>7</b>   | SI-5  |
| <sup>1</sup> H and <sup>13</sup> C NMR spectra of compound <b>8</b>   | SI-6  |
| <sup>1</sup> H and <sup>13</sup> C NMR spectra of compound <b>9a</b>  | SI-7  |
| 2D NMR and NOE spectra of compound <b>9a</b>                          | SI-8  |
| <sup>1</sup> H and <sup>13</sup> C NMR spectra of compound <b>9b</b>  | SI-9  |
| <sup>1</sup> H and <sup>13</sup> C NMR spectra of compound <b>10a</b> | SI-10 |
| <sup>1</sup> H and <sup>13</sup> C NMR spectra of compound <b>10b</b> | SI-11 |
| <sup>1</sup> H and <sup>13</sup> C NMR spectra of compound <b>11</b>  | SI-12 |
| 2D NMR spectra of compound <b>11</b>                                  | SI-13 |
| 2D NMR and NOE spectra of compound <b>11'</b>                         | SI-14 |
| <sup>1</sup> H and <sup>13</sup> C NMR spectra of compound <b>12</b>  | SI-15 |
| <sup>1</sup> H and <sup>13</sup> C NMR spectra of compound <b>13</b>  | SI-16 |
| <sup>1</sup> H and <sup>13</sup> C NMR spectra of compound <b>14</b>  | SI-17 |
| <sup>1</sup> H and <sup>13</sup> C NMR spectra of compound <b>15</b>  | SI-18 |
| <sup>1</sup> H and <sup>13</sup> C NMR spectra of compound <b>16</b>  | SI-19 |
| <sup>1</sup> H and <sup>13</sup> C NMR spectra of compound <b>17</b>  | SI-20 |
| <sup>1</sup> H and <sup>13</sup> C NMR spectra of compound <b>18</b>  | SI-21 |
| <sup>1</sup> H and <sup>13</sup> C NMR spectra of compound <b>19</b>  | SI-22 |
| X-Ray Diffraction Data                                                | SI-23 |

### <sup>1</sup>H NMR spectrum of compound 4

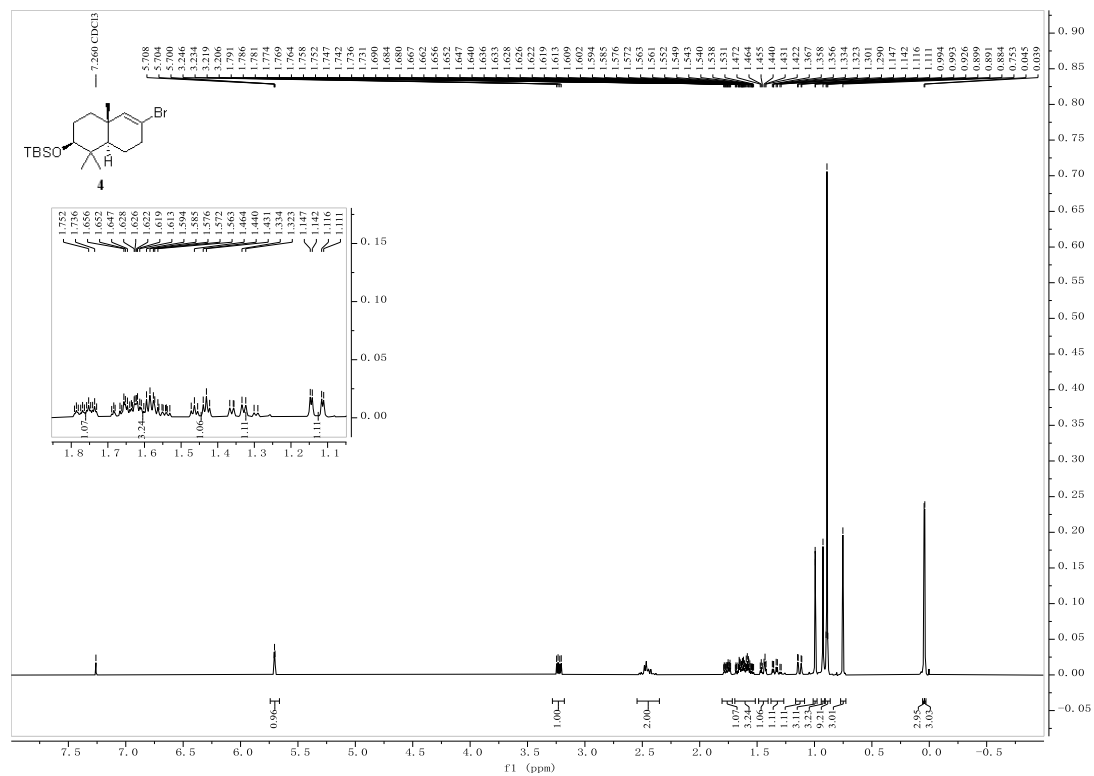

### <sup>13</sup>C NMR spectrum of compound 4

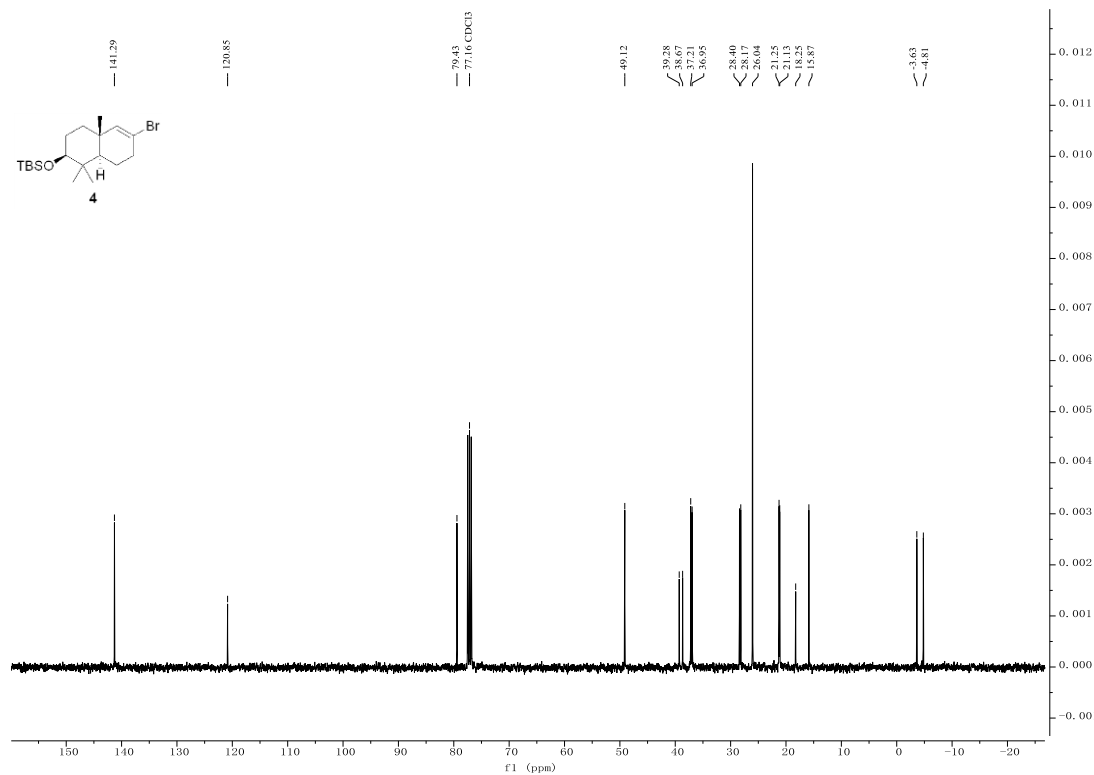

### <sup>1</sup>H NMR spectrum of compound 5

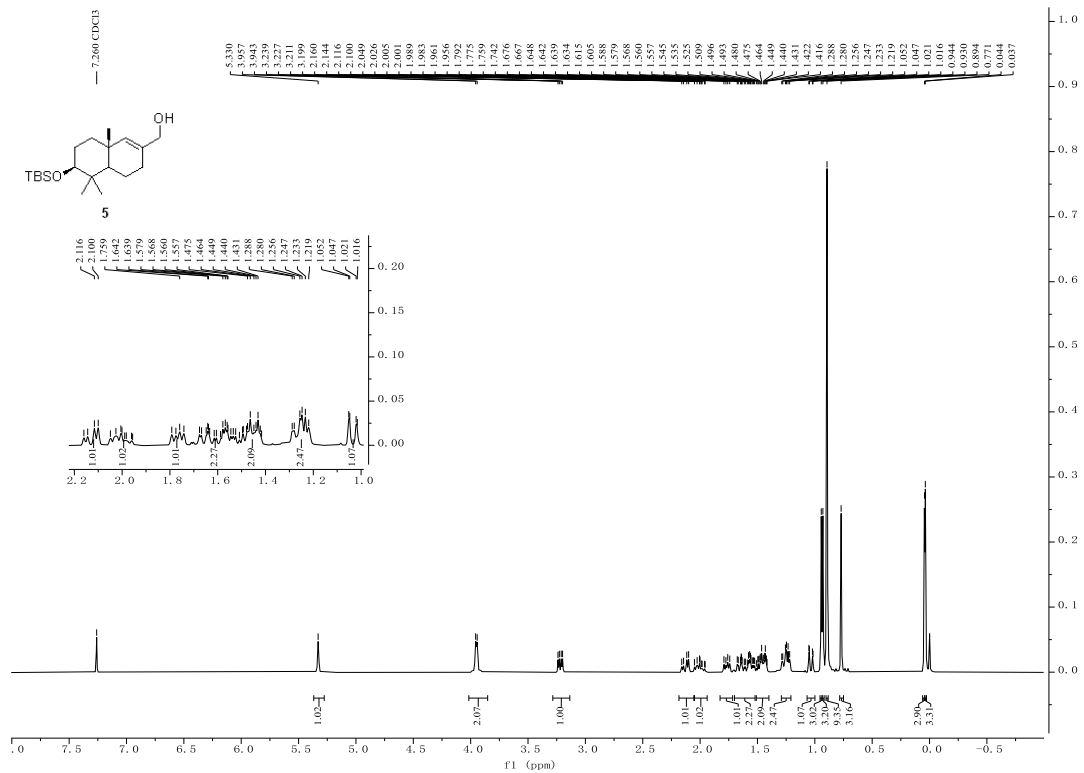

### <sup>13</sup>C NMR spectrum of compound 5

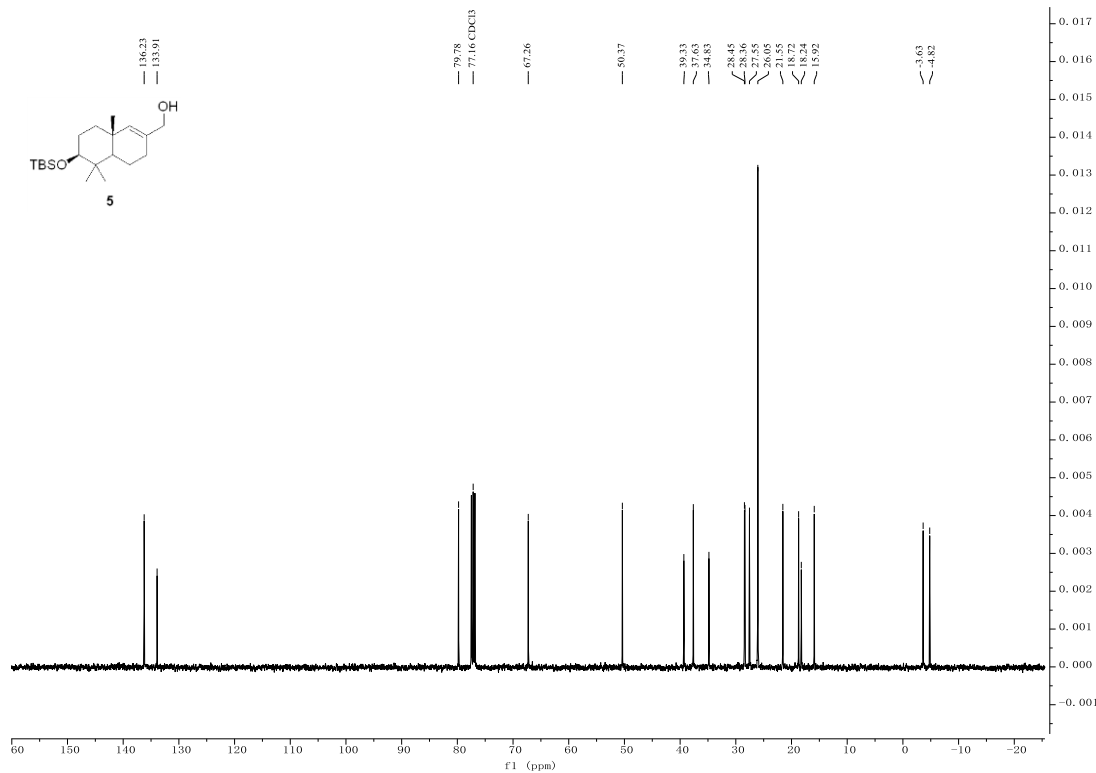

<sup>1</sup>H NMR spectrum of compound 6

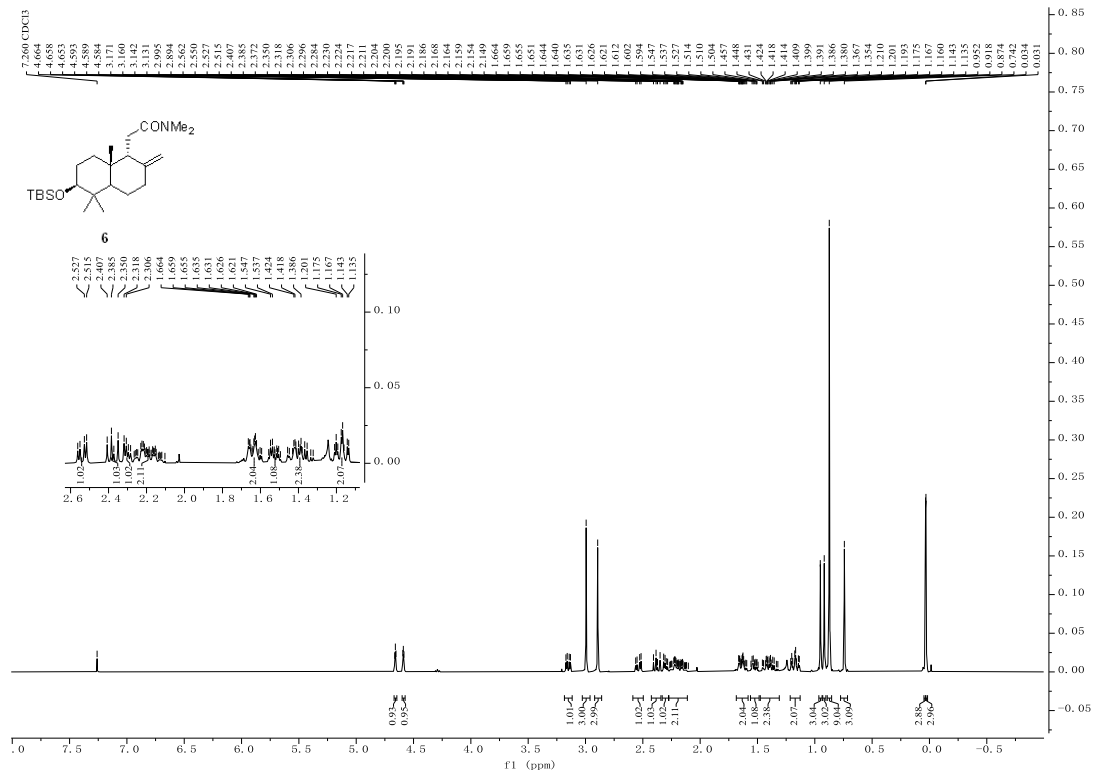

<sup>13</sup>C NMR spectrum of compound 6

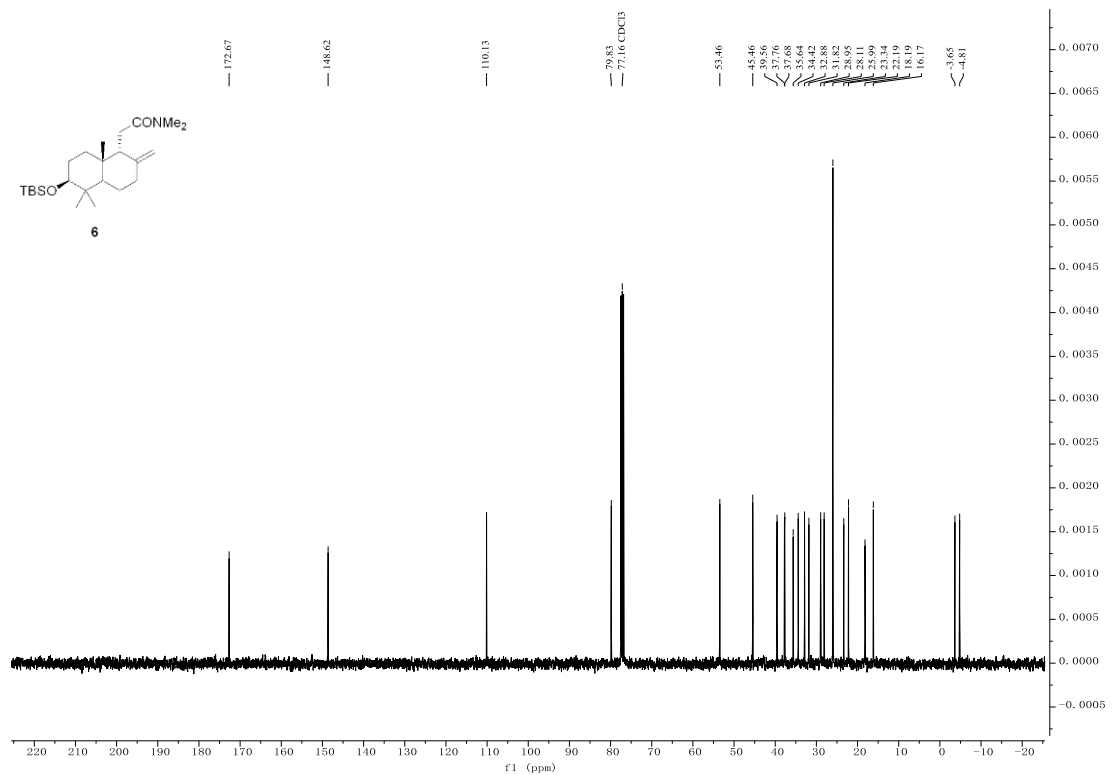

### <sup>1</sup>H NMR spectrum of compound 7

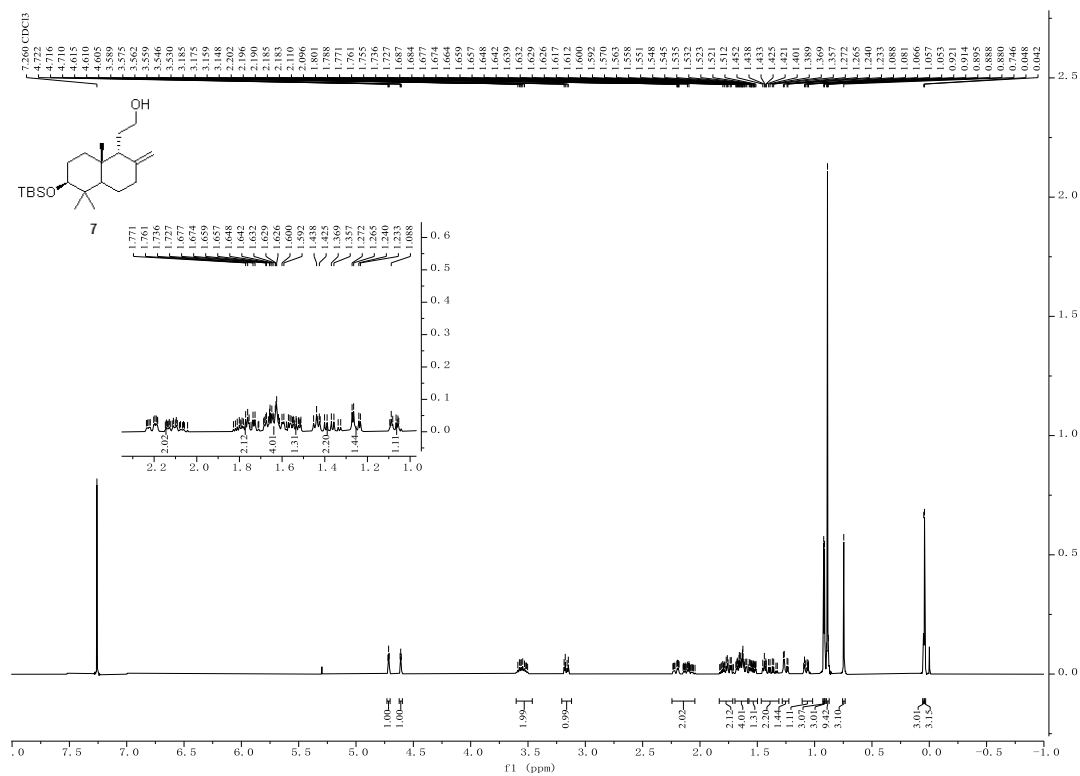

### <sup>13</sup>C NMR spectrum of compound 7

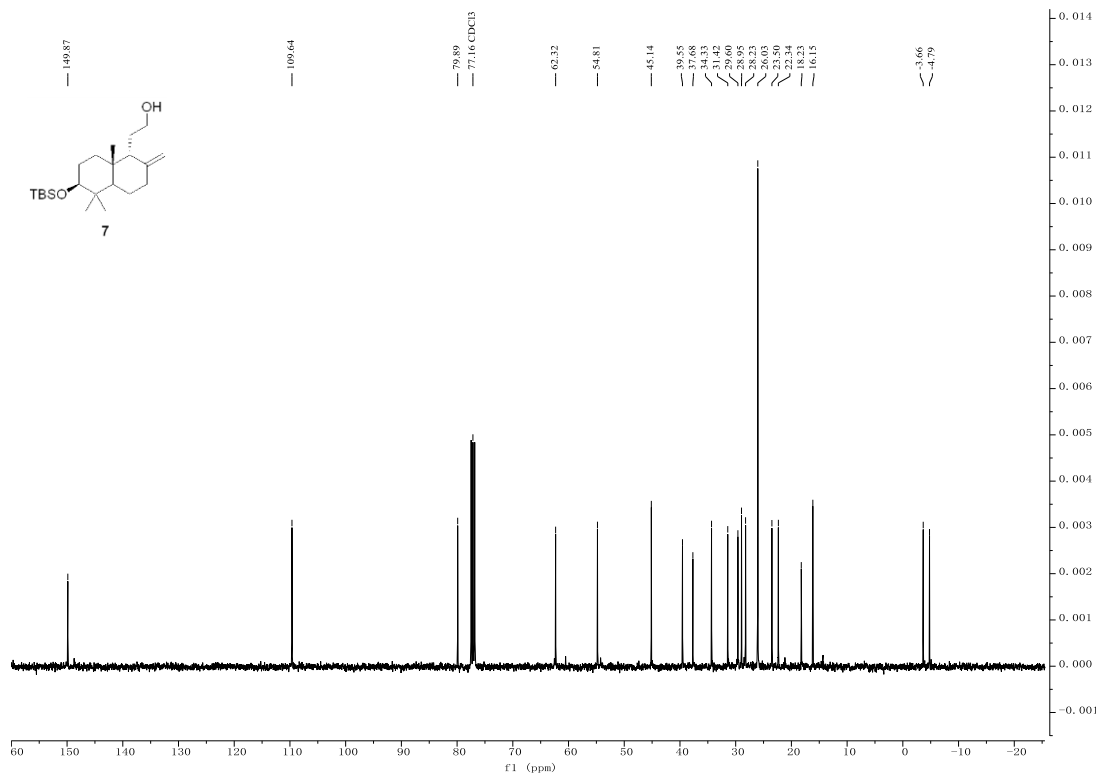

### <sup>1</sup>H NMR spectrum of compound 8

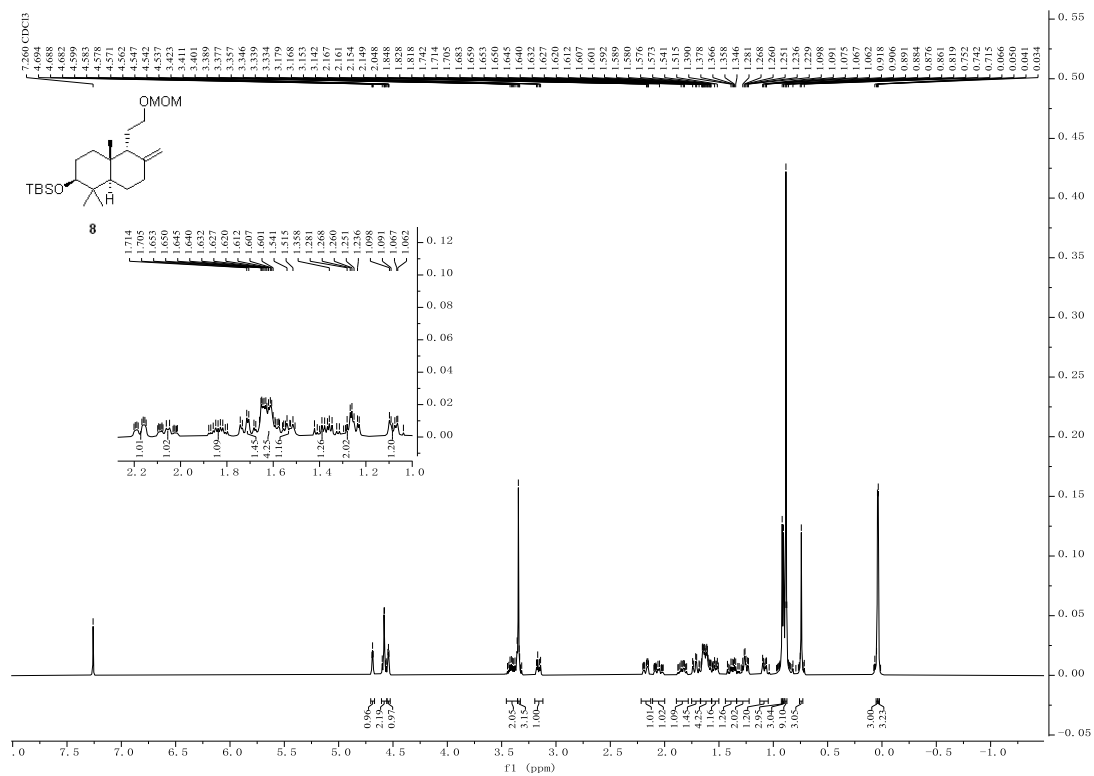

### <sup>13</sup>C NMR spectrum of compound 8

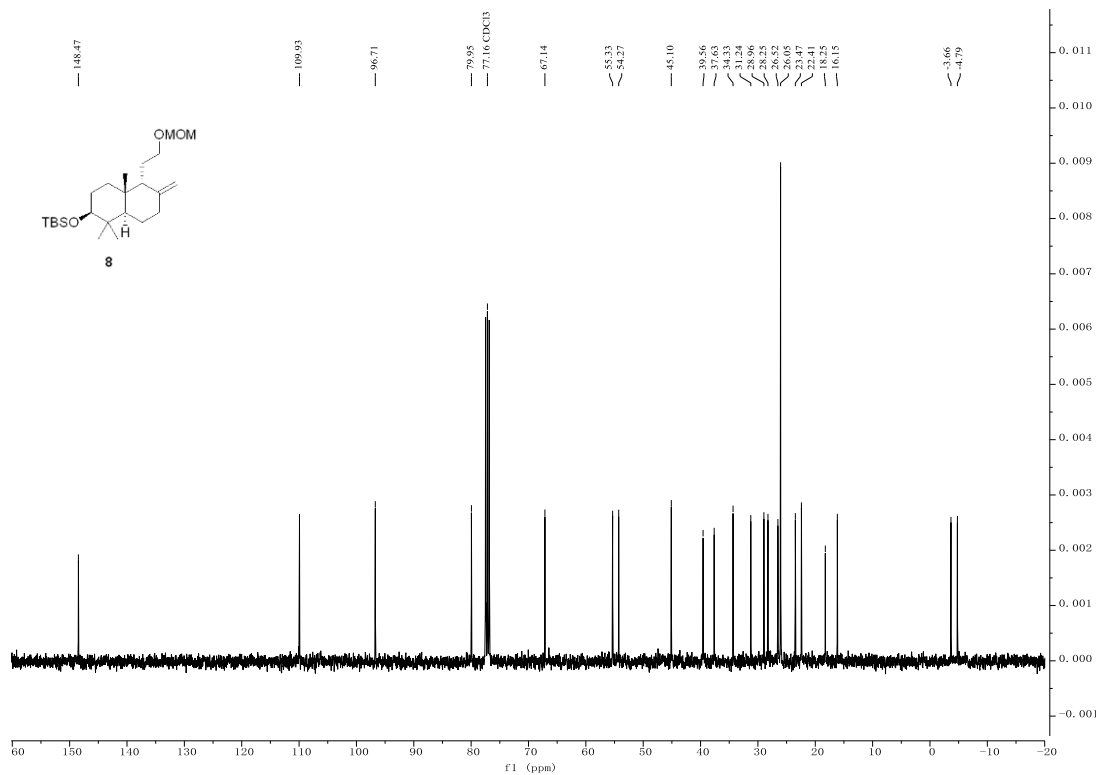

### <sup>1</sup>H NMR spectrum of compound 9a

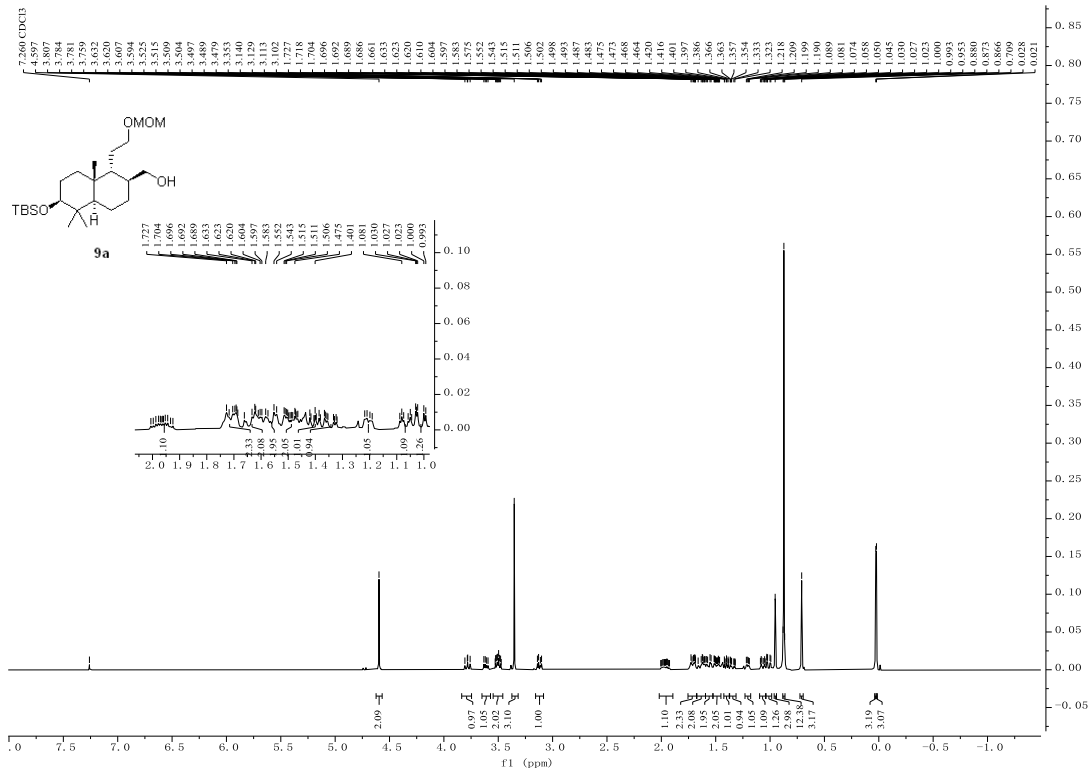

### <sup>13</sup>C NMR spectrum of compound 9a

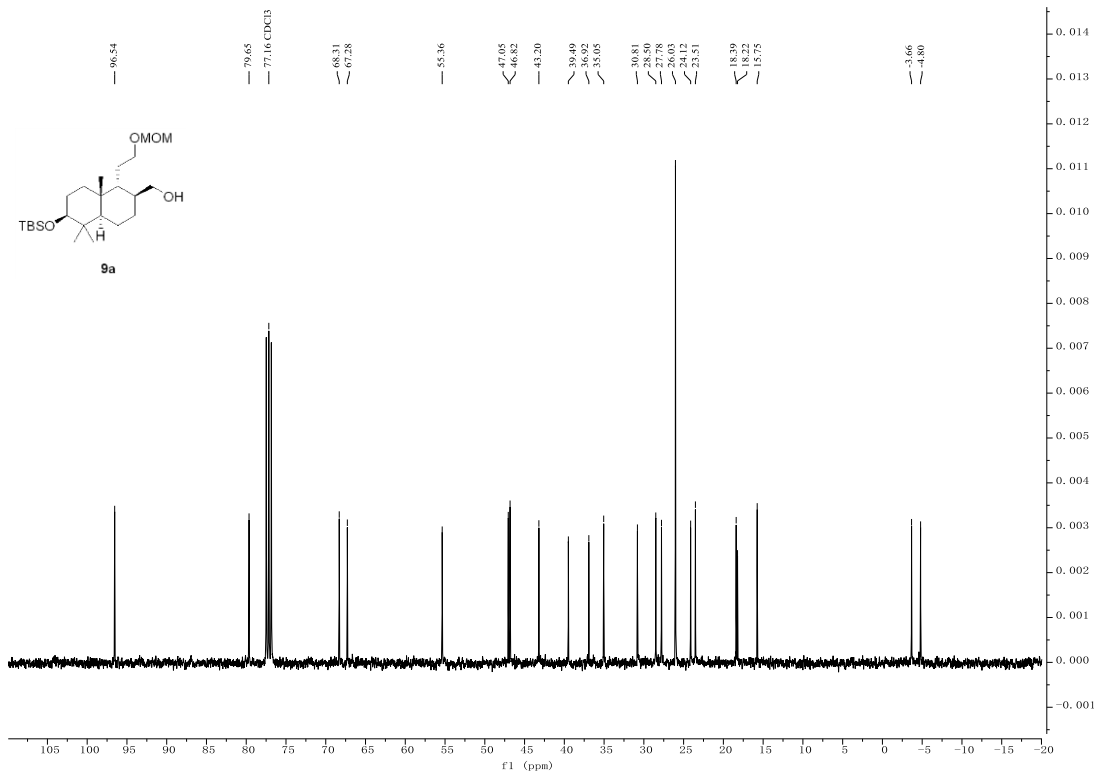

### HMQC spectrum of compound 9a

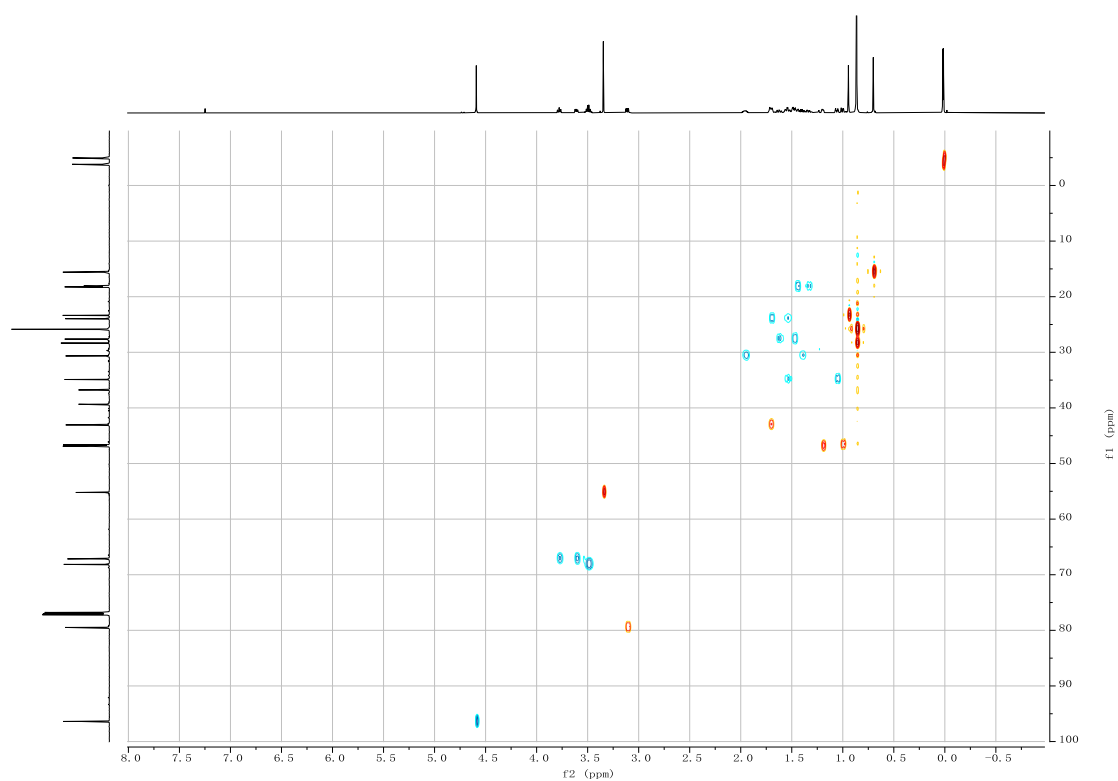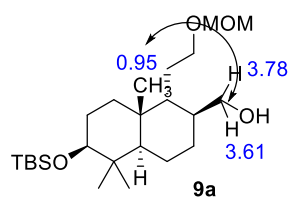

### NOE spectrum of compound 9a

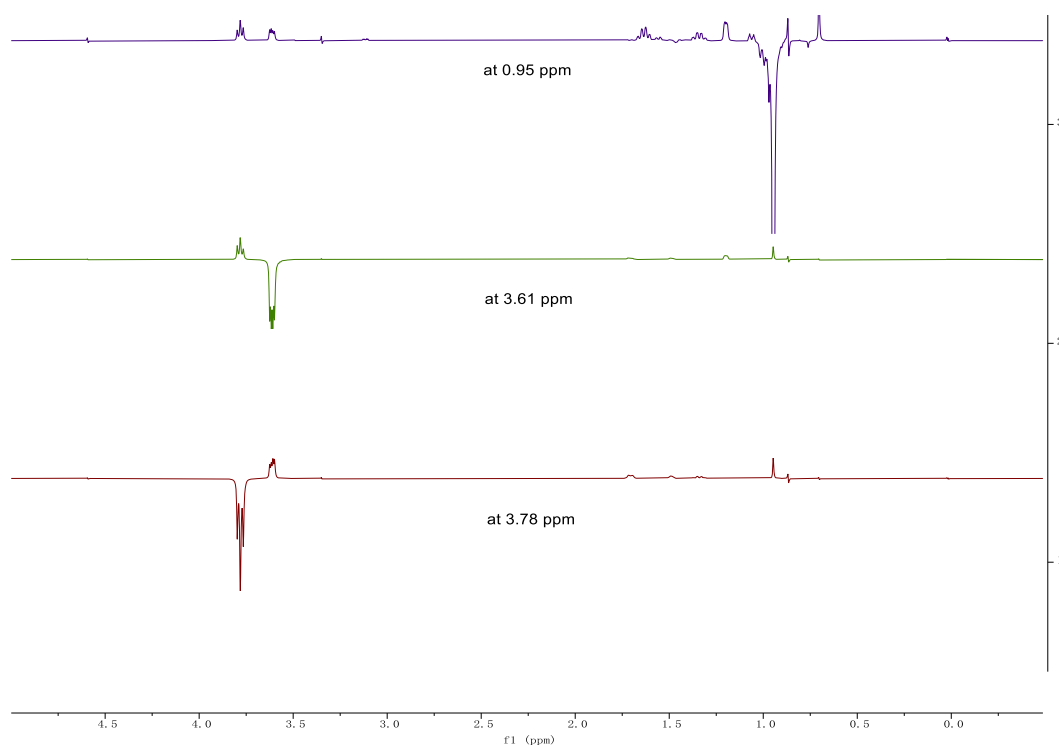



### <sup>1</sup>H NMR spectrum of compound **9b**

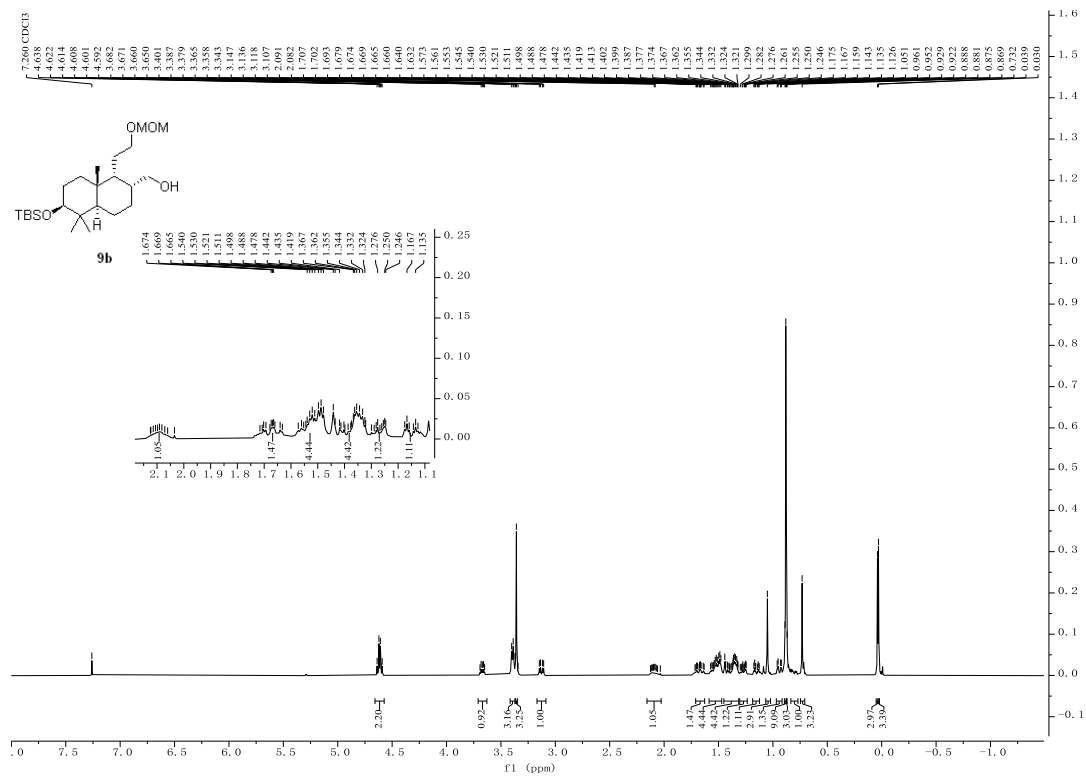

### <sup>13</sup>C NMR spectrum of compound **9b**

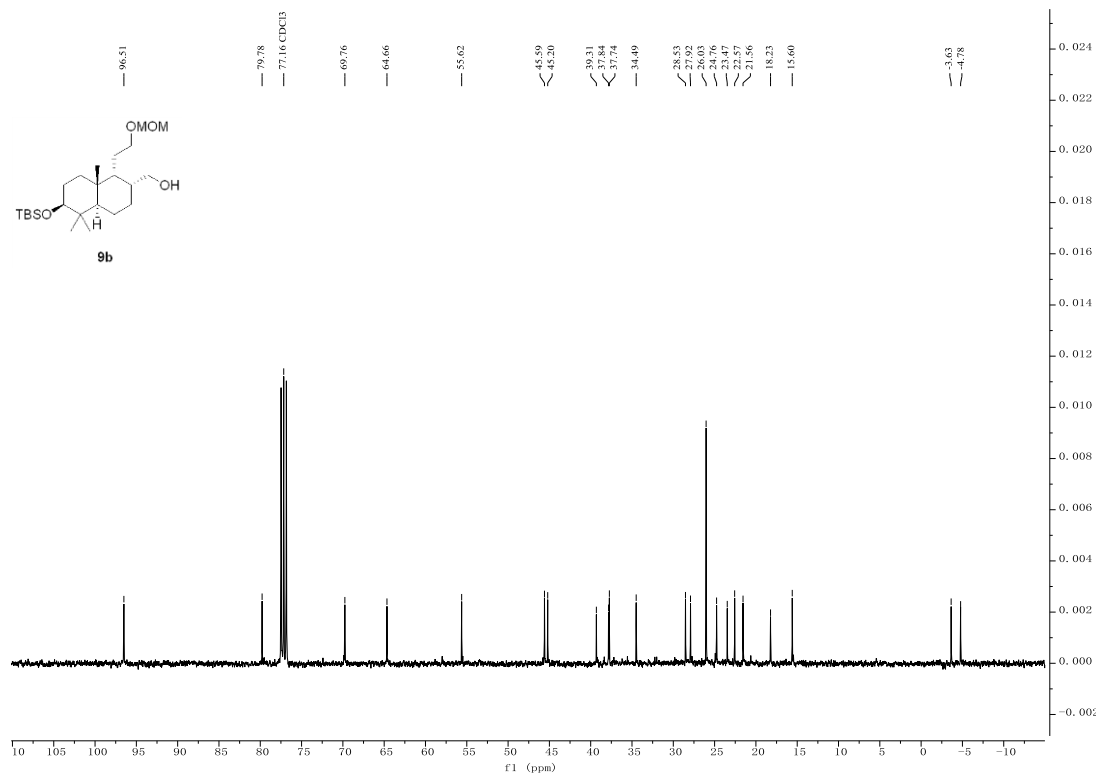

# <sup>1</sup>H NMR spectrum of compound 10a

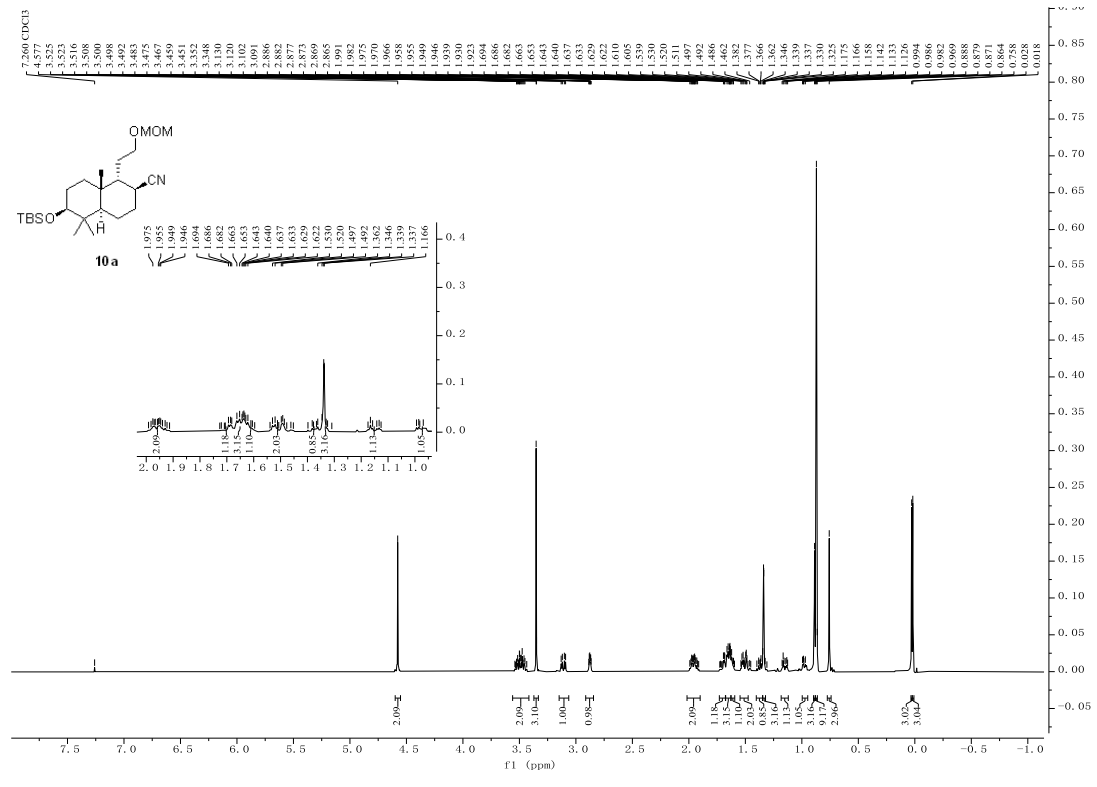

# <sup>13</sup>C NMR spectrum of compound 10a

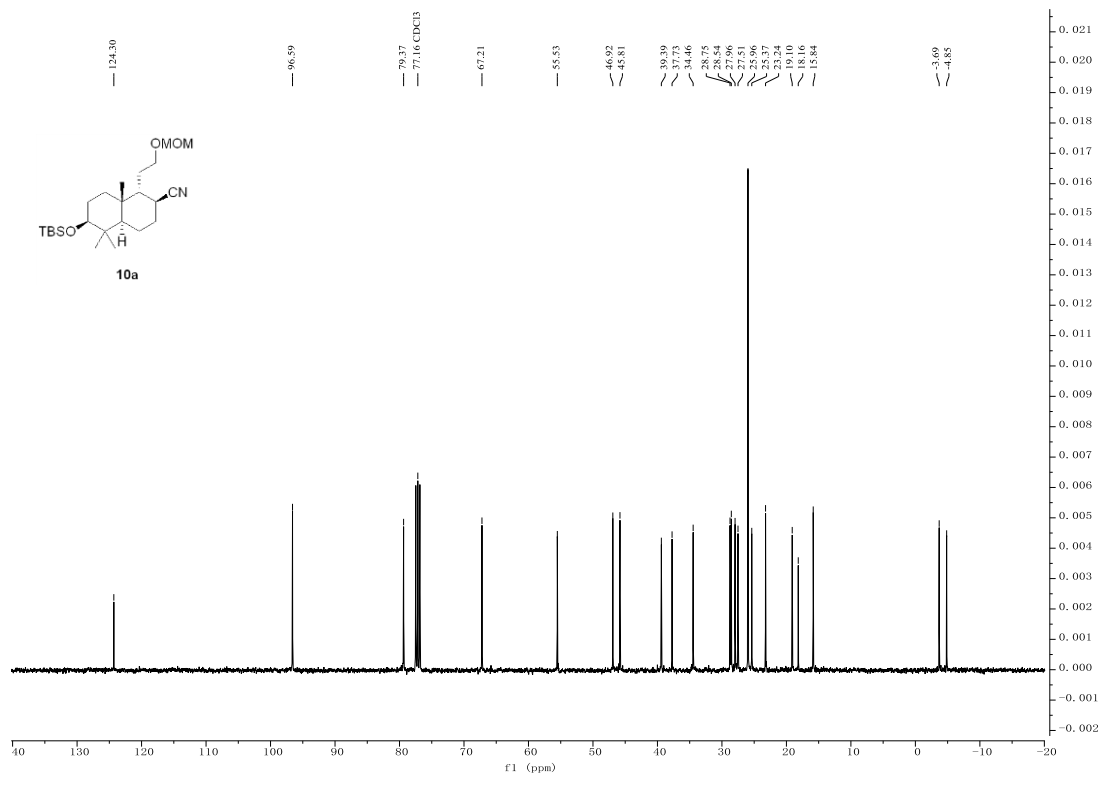

### <sup>1</sup>H NMR spectrum of compound 10b

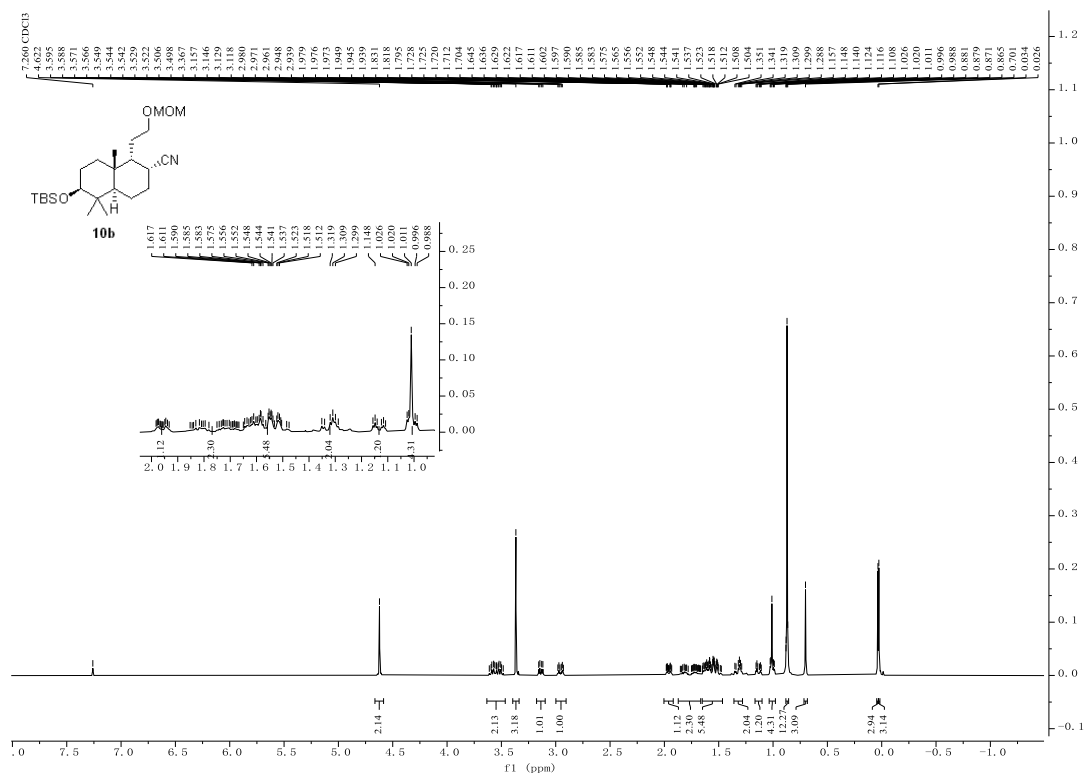

### <sup>13</sup>C NMR spectrum of compound 10b

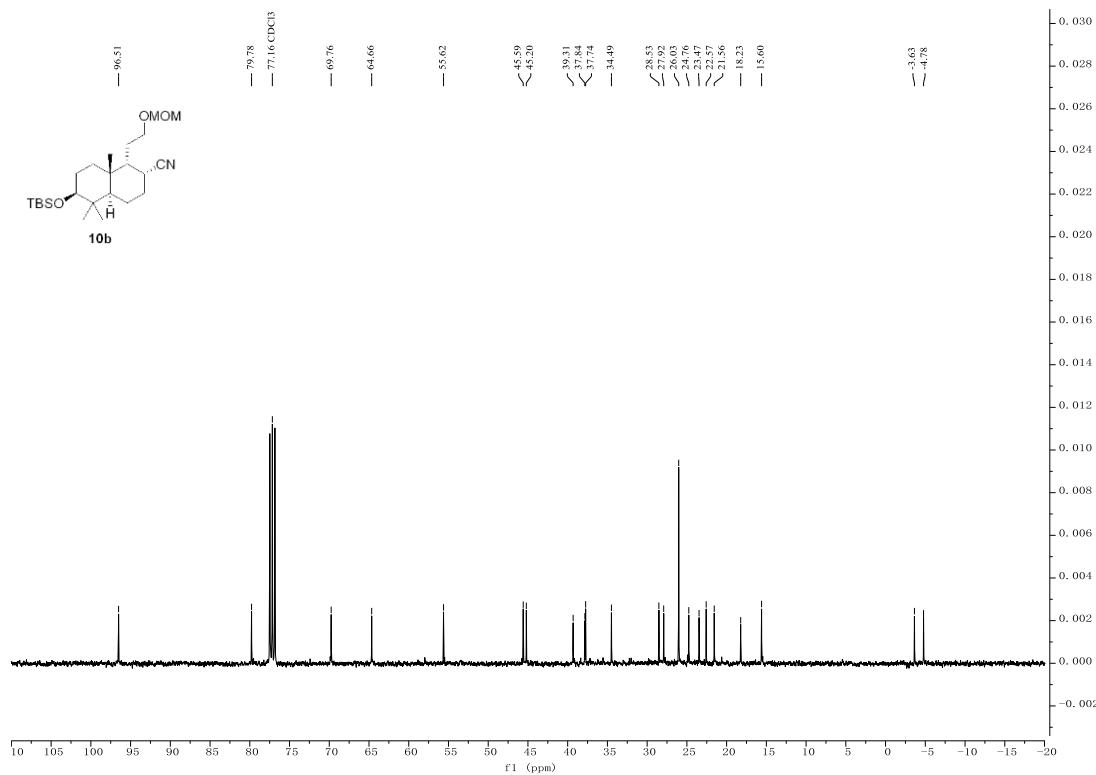

<sup>1</sup>H NMR spectrum of compound 11

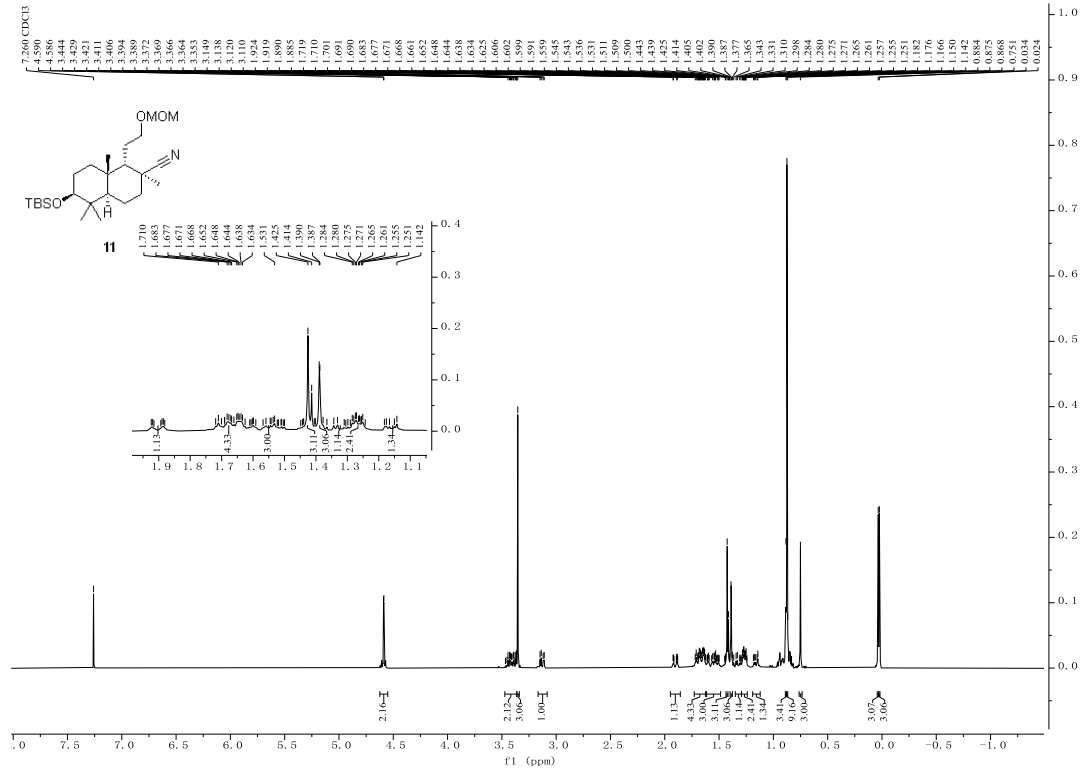

<sup>13</sup>C NMR spectrum of compound 11

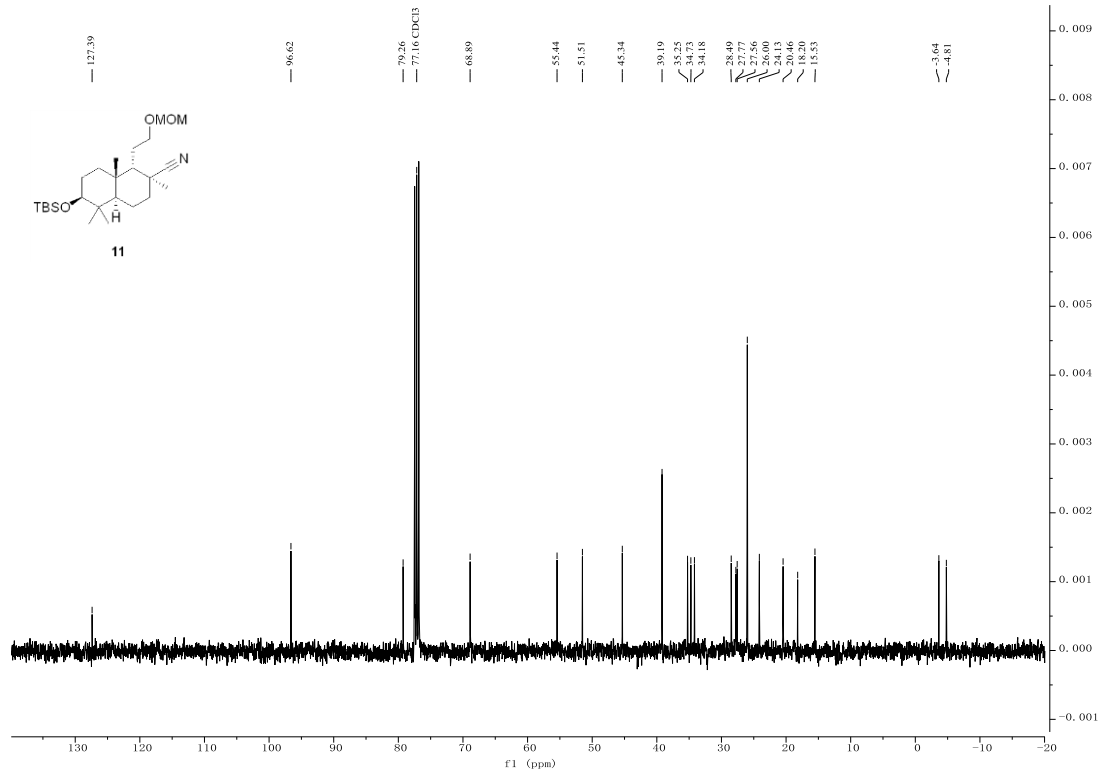

HMQC spectrum of compound **11**

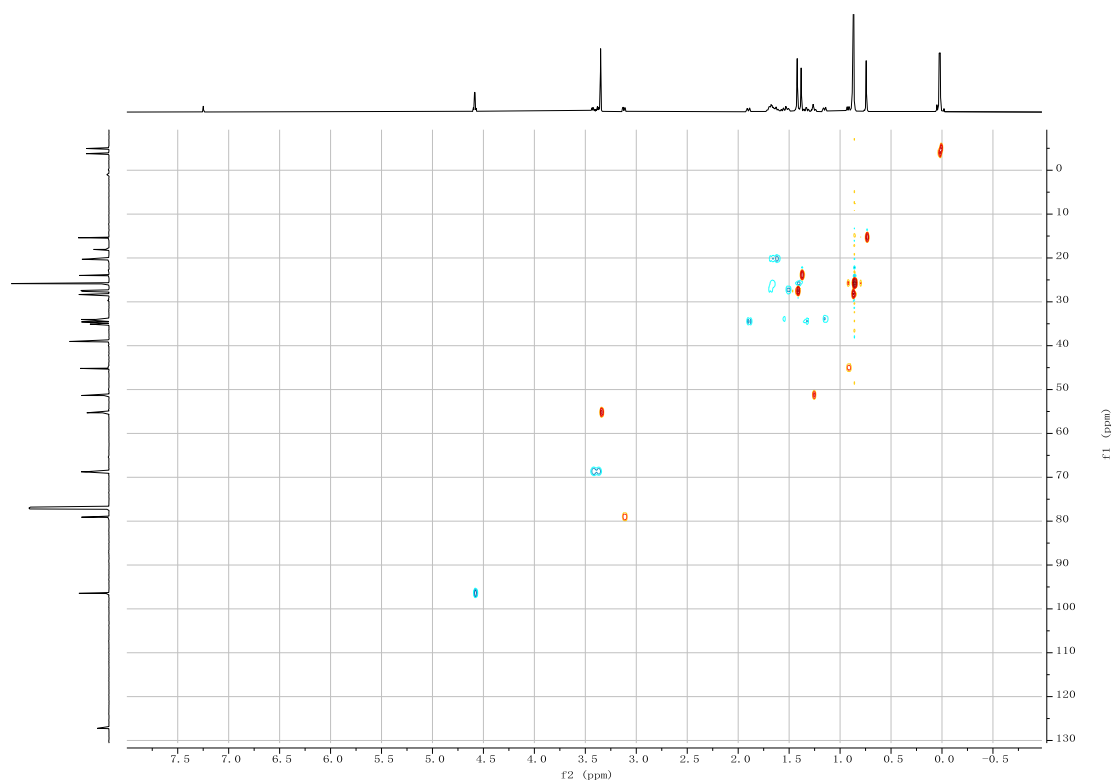

HMBC spectrum of compound **11**

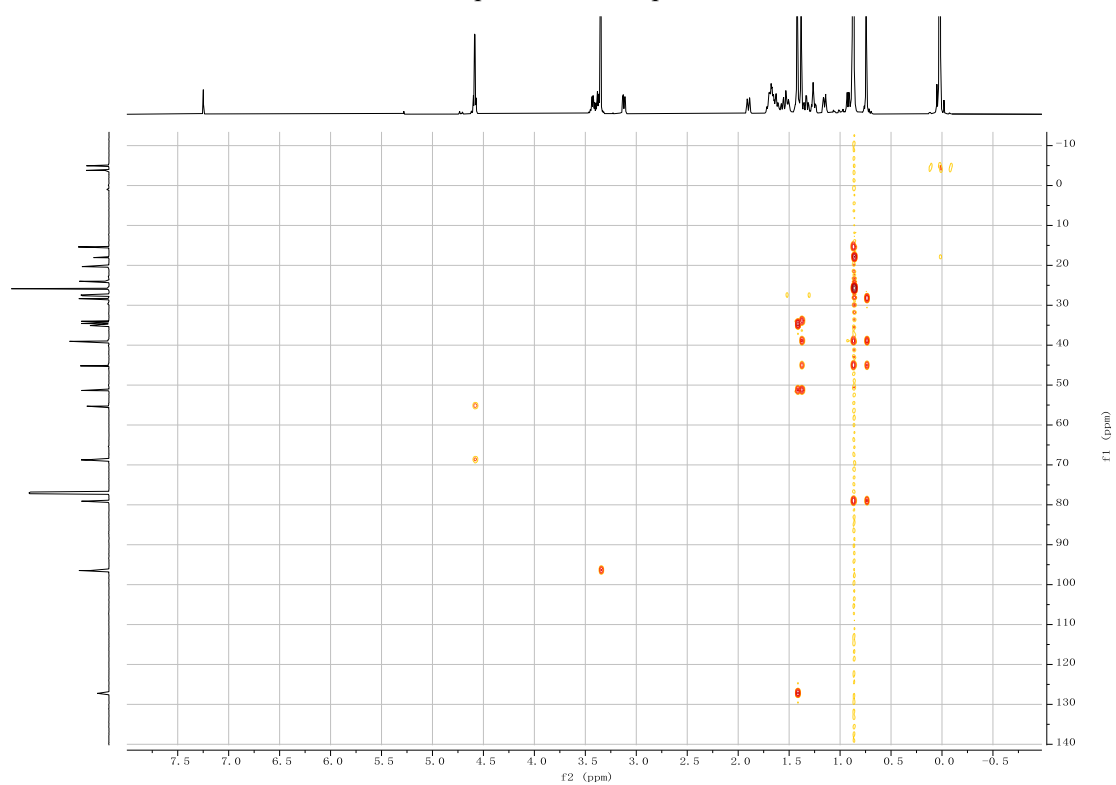

### HMBC spectrum of compound **11'** (deprotection)

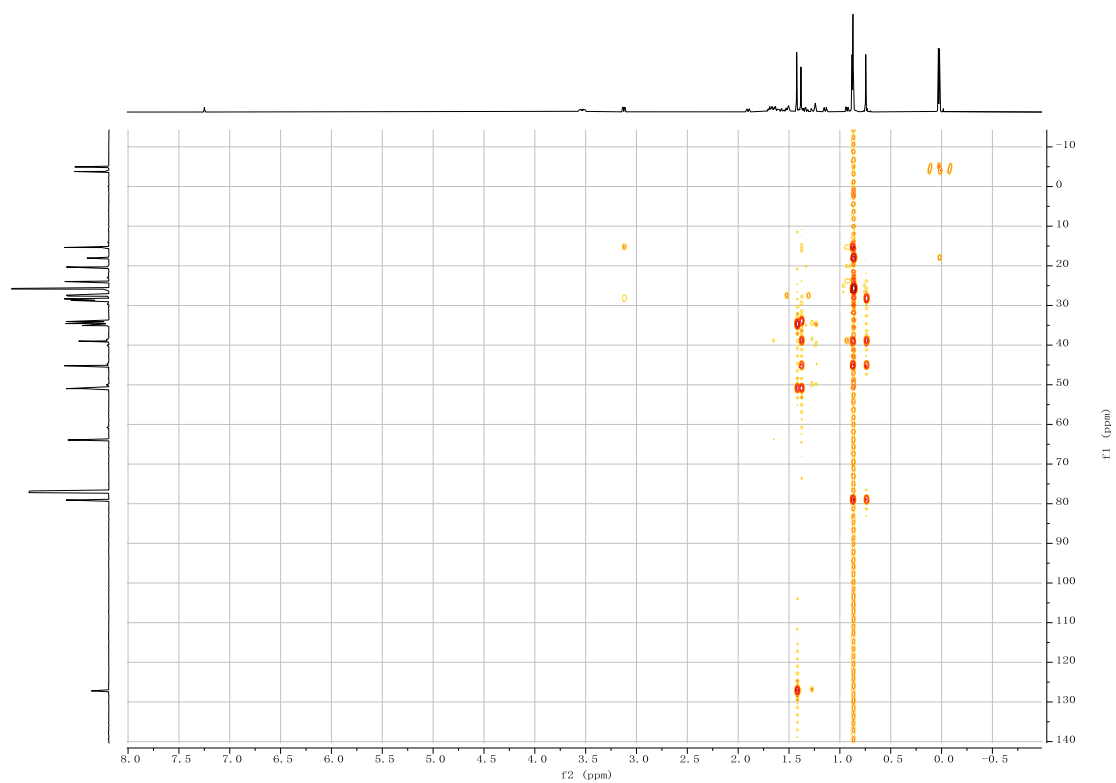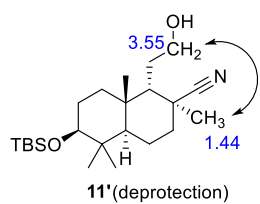

### NOE spectrum of compound **11'** (deprotection)

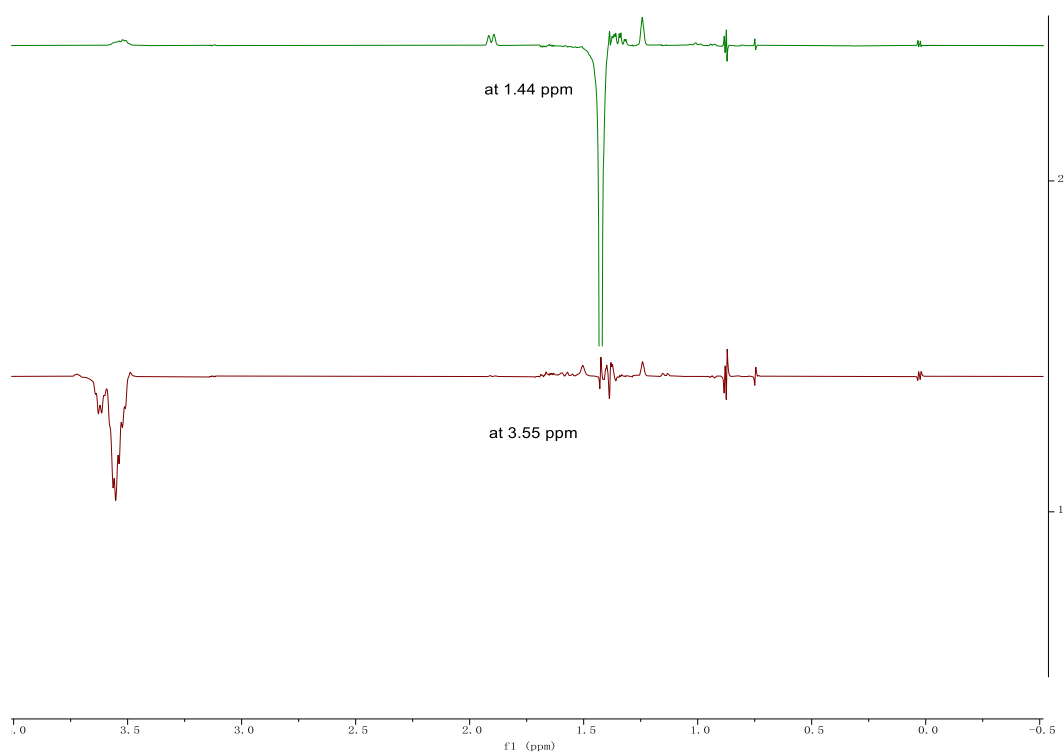

<sup>1</sup>H NMR spectrum of compound 12

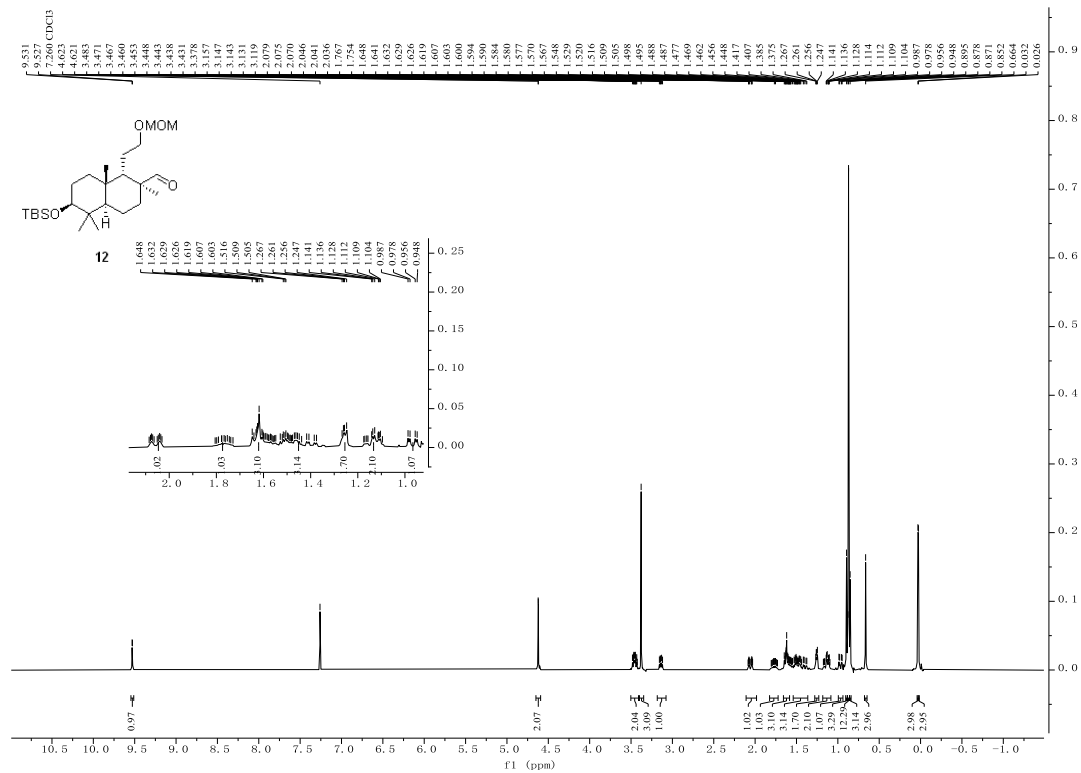

<sup>13</sup>C NMR spectrum of compound 12

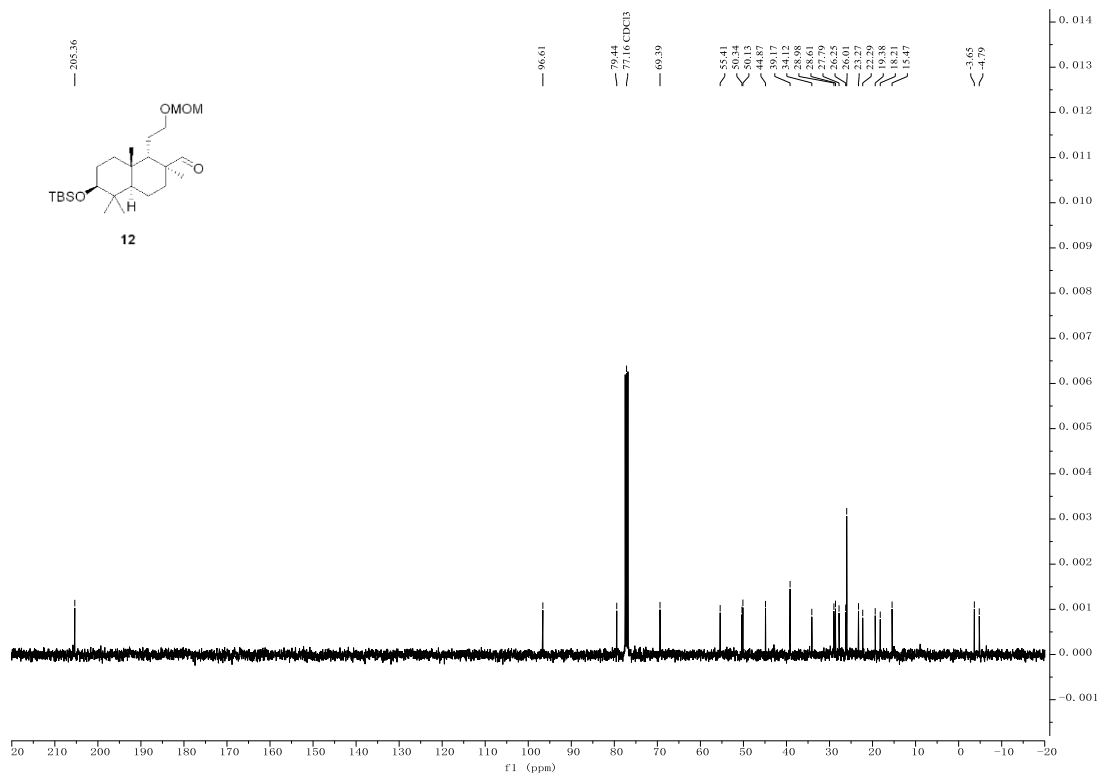

### <sup>1</sup>H NMR spectrum of compound 13

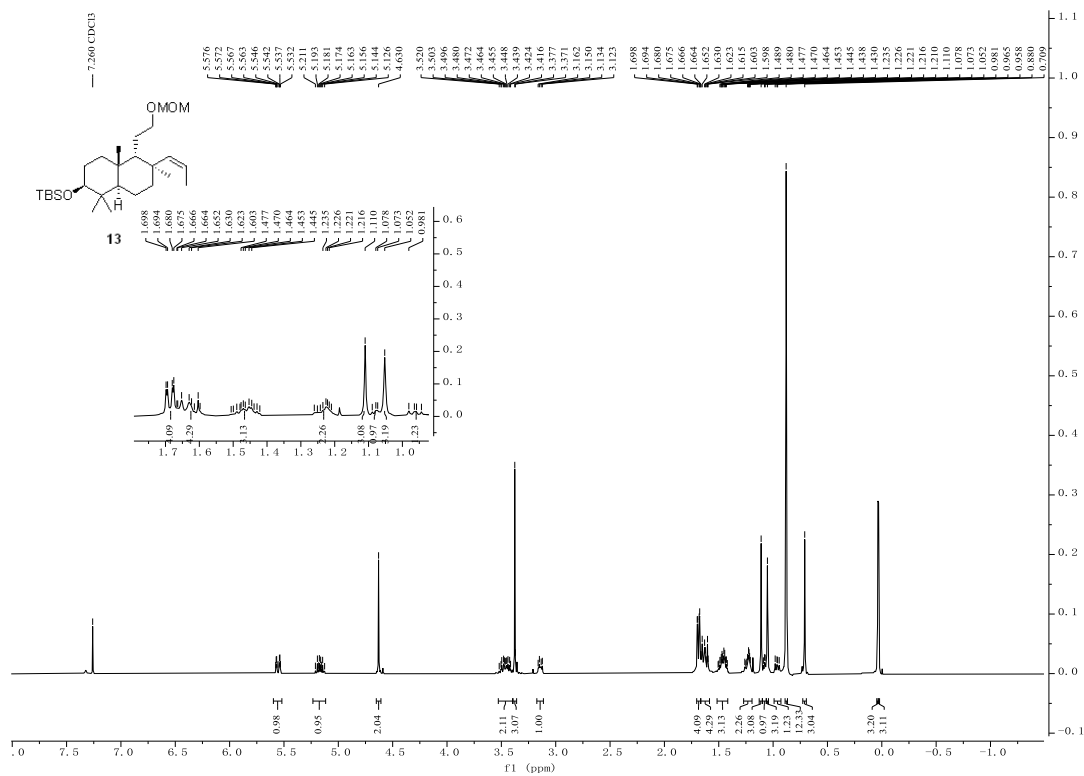

### <sup>13</sup>C NMR spectrum of compound 13

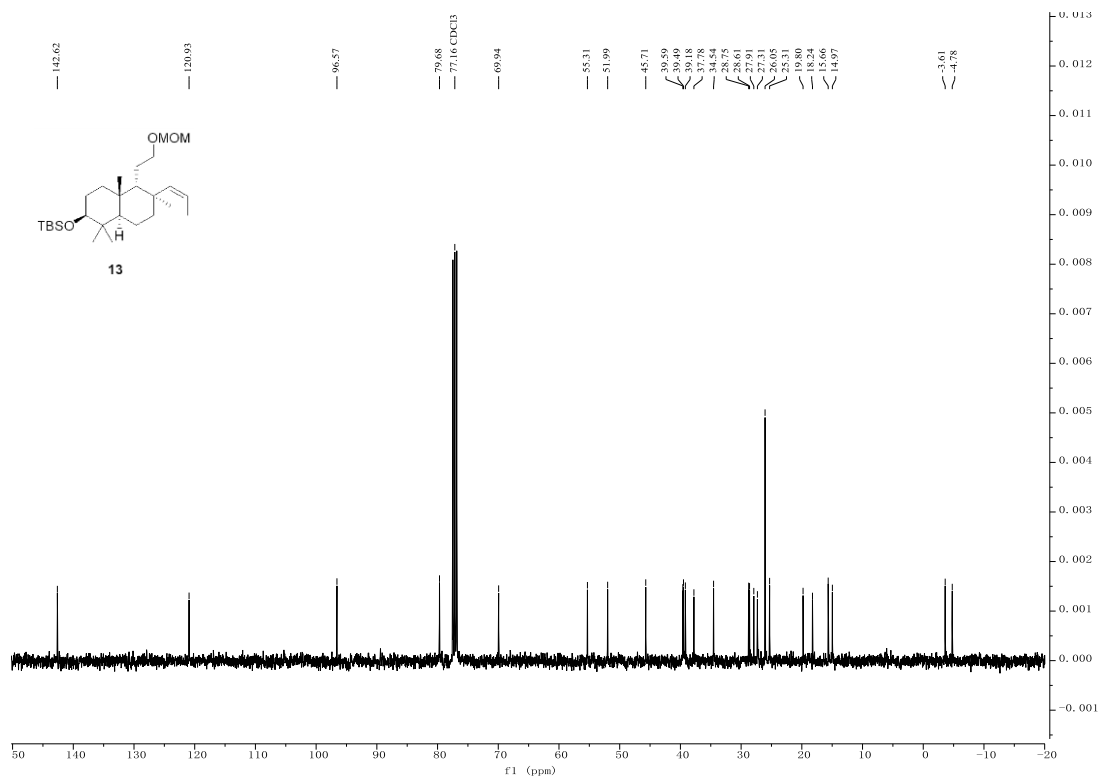





### <sup>1</sup>H NMR spectrum of compound 15

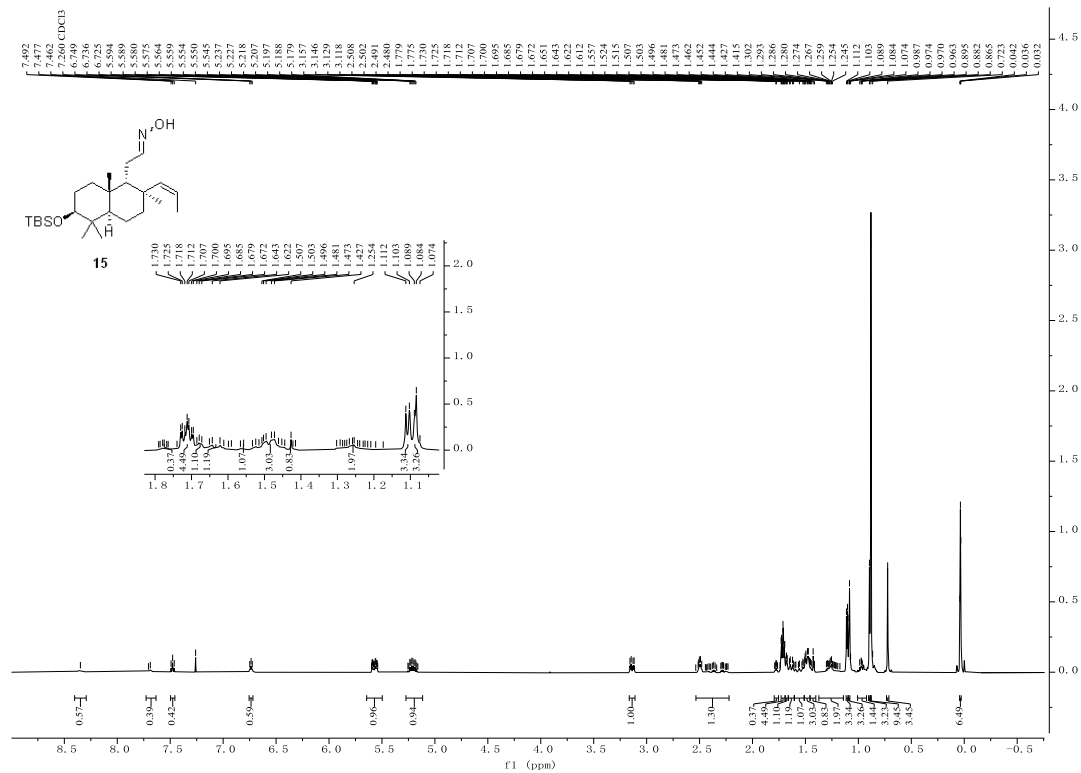

### <sup>13</sup>C NMR spectrum of compound 15

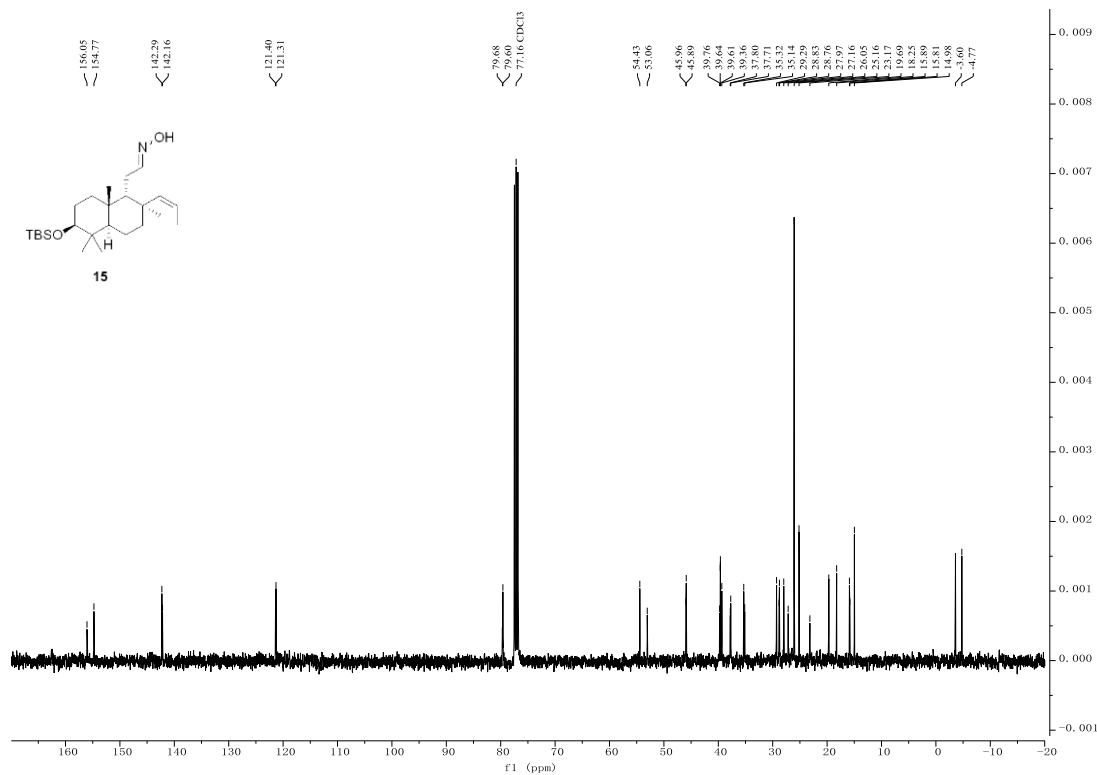

### <sup>1</sup>H NMR spectrum of compound 16

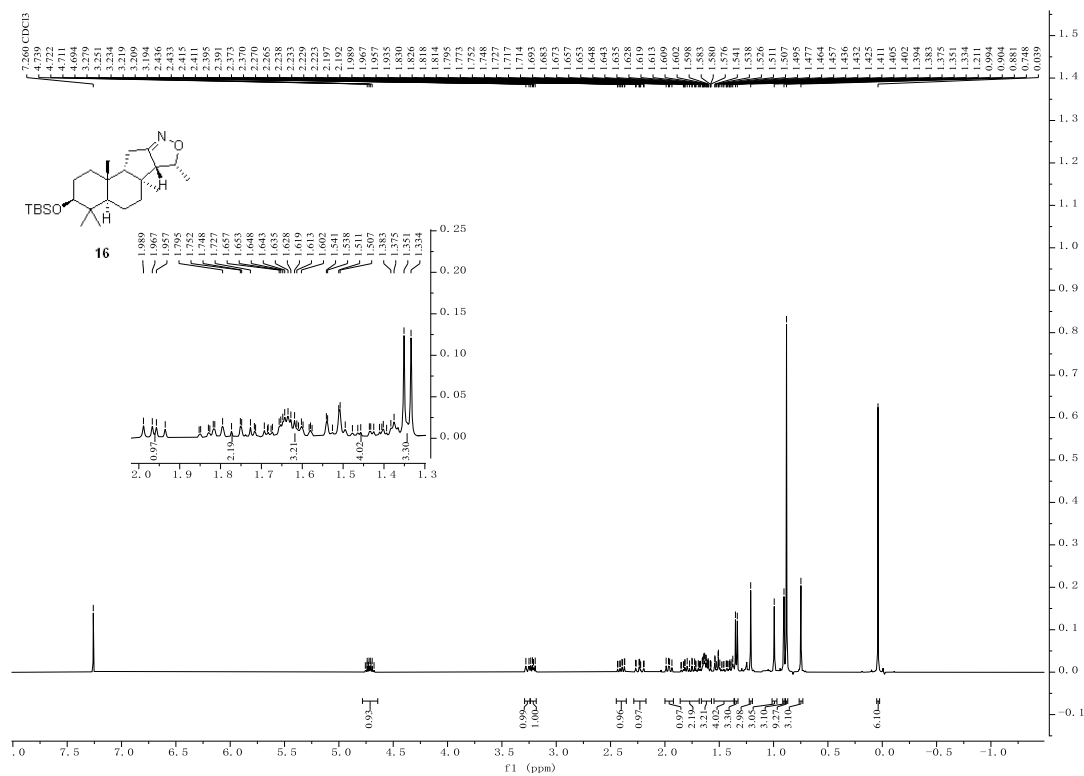

### <sup>13</sup>C NMR spectrum of compound 16

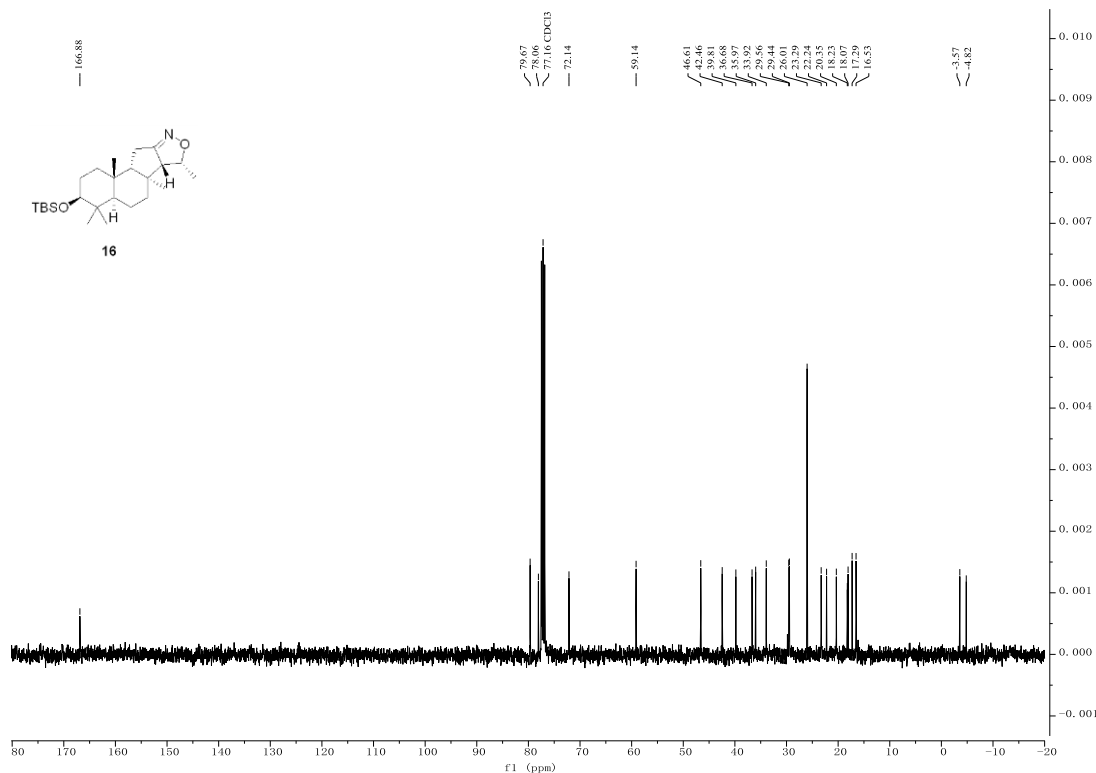



<sup>1</sup>H NMR spectrum of compound 18

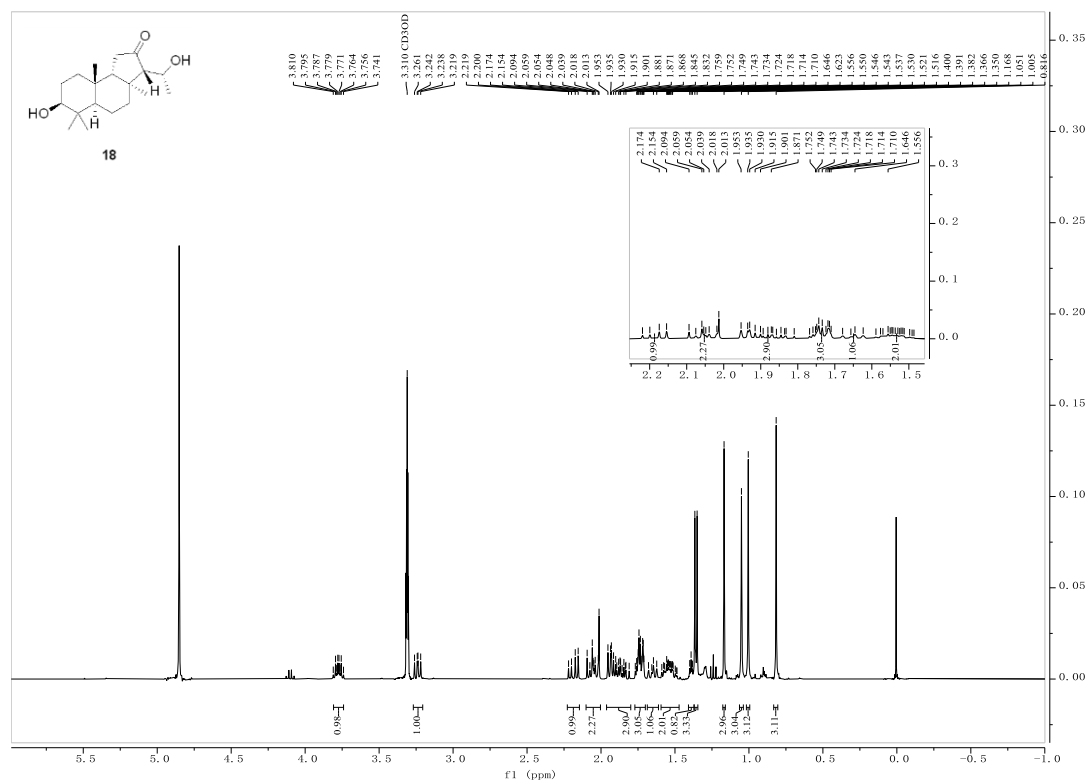

<sup>13</sup>C NMR spectrum of compound 18

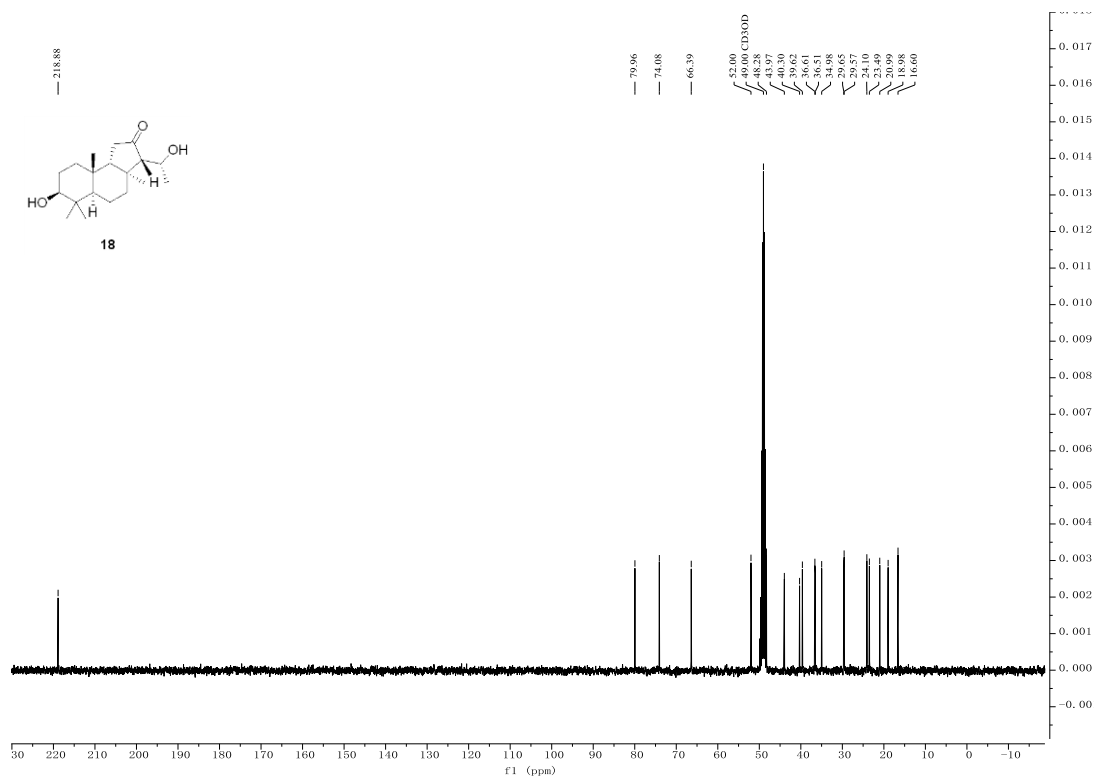

$^1\text{H}$  NMR spectrum of compound 19

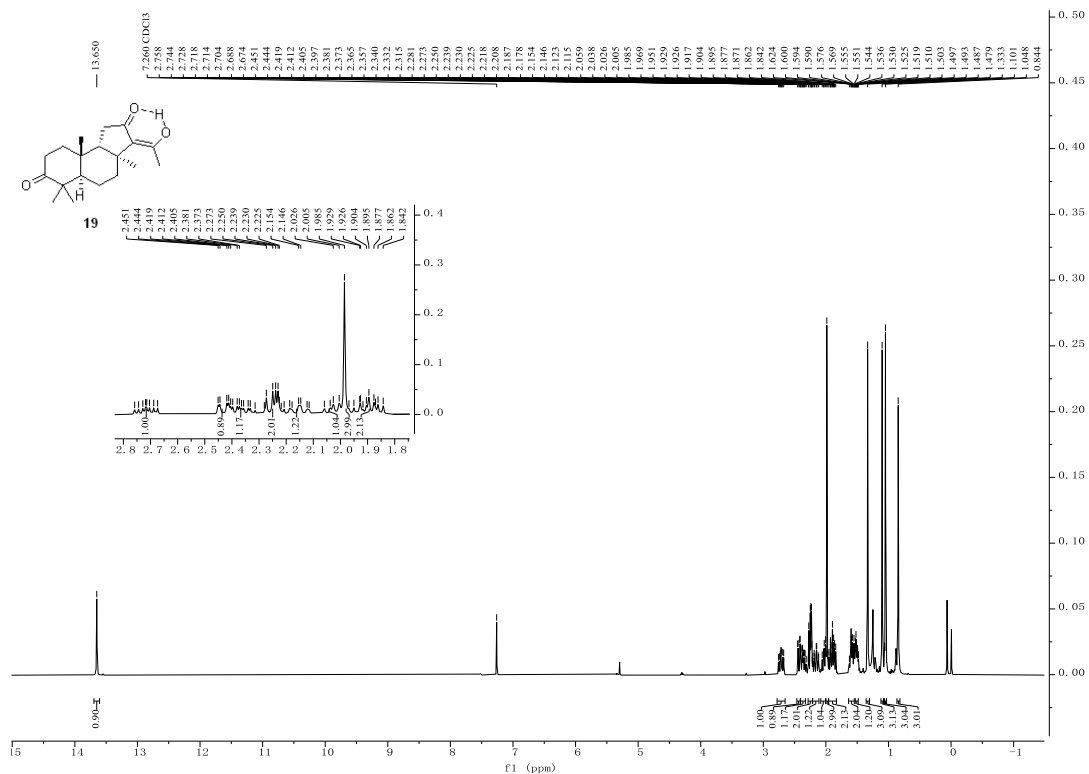

$^{13}\text{C}$  NMR spectrum of compound 19

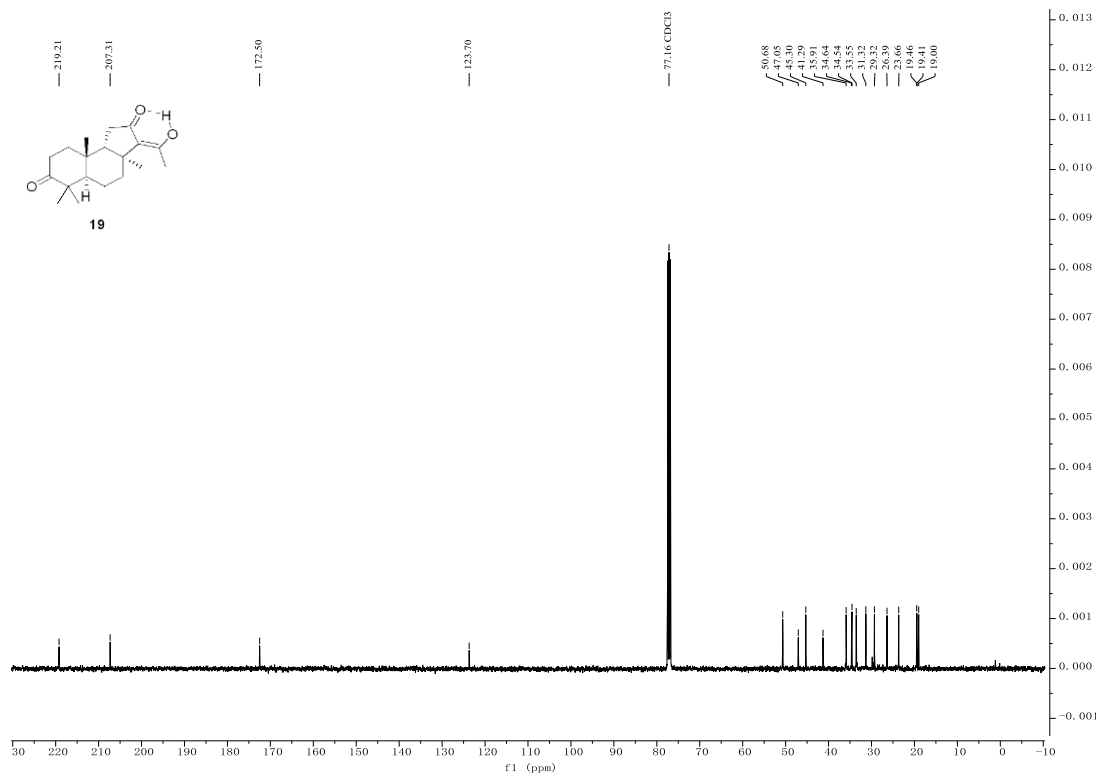

X-ray diffraction data of compound **17** (CCDC 2244331)

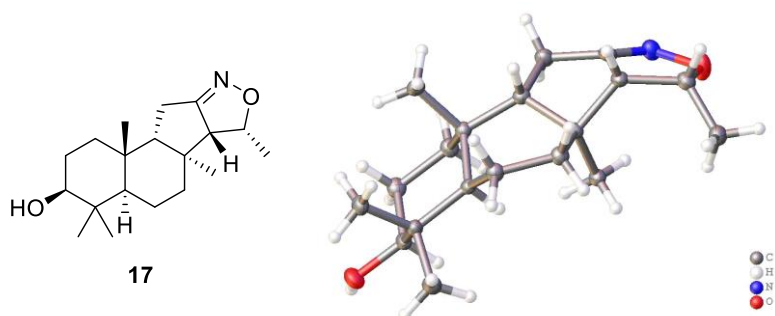

### Crystal data and structure refinement compound **17**

|                                                                         |                                                   |
|-------------------------------------------------------------------------|---------------------------------------------------|
| Identification code                                                     | exp_8288                                          |
| Empirical formula                                                       | C <sub>19</sub> H <sub>31</sub> NO <sub>2</sub>   |
| Formula weight                                                          | 305.45                                            |
| Temperature / K                                                         | 113.70(14)                                        |
| Crystal system                                                          | monoclinic                                        |
| Space group                                                             | P2 <sub>1</sub> /n                                |
| a / Å, b / Å, c / Å                                                     | 7.3053(3), 12.1351(4), 18.2588(9)                 |
| α/°, β/°, γ/°                                                           | 90.00, 92.115(4), 90.00                           |
| Volume / Å <sup>3</sup>                                                 | 1617.56(12)                                       |
| Z                                                                       | 4                                                 |
| ρ <sub>calc</sub> / mg mm <sup>-3</sup>                                 | 1.254                                             |
| μ / mm <sup>-1</sup>                                                    | 0.080                                             |
| F(000)                                                                  | 672                                               |
| Crystal size / mm <sup>3</sup>                                          | 0.30 × 0.27 × 0.15                                |
| Radiation                                                               | MoKα (λ = 0.71073)                                |
| 2θ range for data collection                                            | 5.94 to 52°                                       |
| Index ranges                                                            | -8 ≤ h ≤ 7, -14 ≤ k ≤ 14, -17 ≤ l ≤ 22            |
| Reflections collected                                                   | 12610                                             |
| Independent reflections                                                 | 3144[R(int) = 0.0428 (inf-0.9Å)]                  |
| Data/restraints/parameters                                              | 3144/0/205                                        |
| Goodness-of-fit on F <sup>2</sup>                                       | 1.037                                             |
| Final R indexes [I > 2σ (I) i.e. F <sub>o</sub> > 4σ (F <sub>o</sub> )] | R <sub>1</sub> = 0.0465, wR <sub>2</sub> = 0.1033 |
| Final R indexes [all data]                                              | R <sub>1</sub> = 0.0612, wR <sub>2</sub> = 0.1129 |
| Largest diff. peak/hole / e Å <sup>-3</sup>                             | 0.263/-0.208                                      |
| Flack Parameters                                                        | N                                                 |
| Completeness                                                            | 0.9980                                            |
